# Supplementary material for: The influence of marital status on the stage at diagnosis, treatment, and survival of adult patients with gastric cancer: a population-based study
Source: PubMed Central journal article supplement (PMC5410231; doi:10.18632/oncotarget.7399), 2016-02-15
Supplement: oncotarget-08-22385-s001.pdf [file oncotarget-08-22385-s001.pdf]

## SUPPLEMENTARY FIGURES AND TABLES

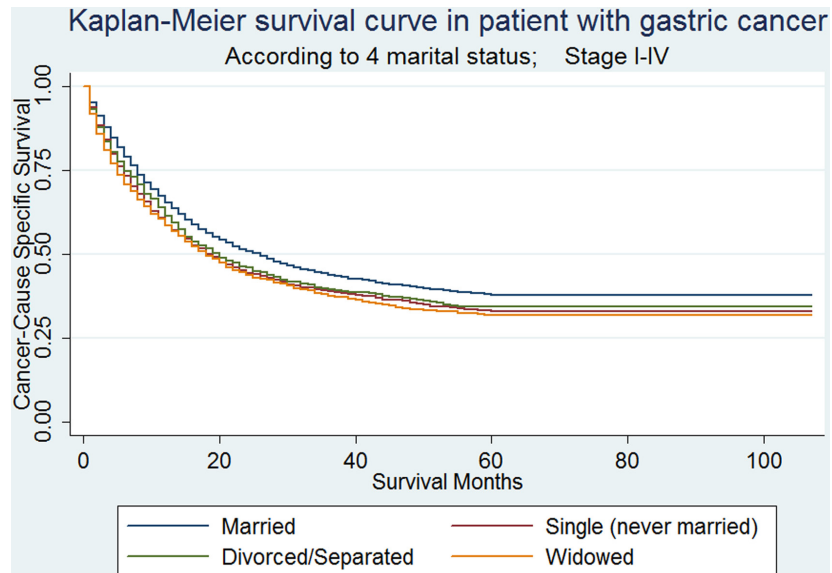

**Supplementary Figure S1: Kaplan-Meier Survival curves: The cancer-specific survival of patients with gastric cancer by marital status, categorized into married, single (never married), divorced or separated and widowed groups.** We compare the survival curves of single, divorced/separated, and widowed groups, among which there was no difference of CCS in univariate log-rank test ( $\chi^2= 3.63$ ,  $P=0.1626$ ) (Figure 1), hence we put them in the same class as unmarried group.

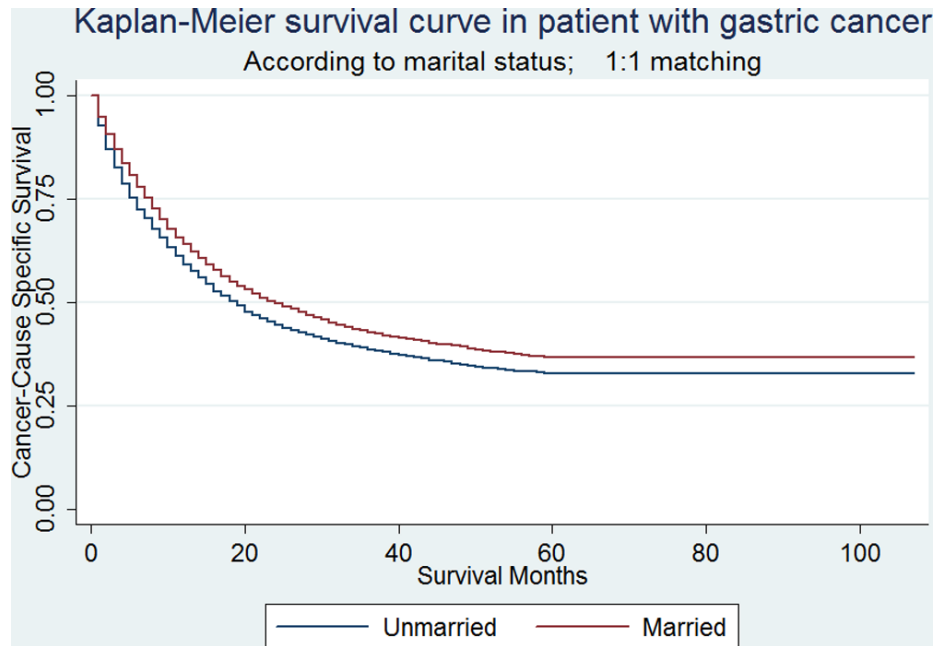

Supplementary Figure S2: Kaplan-Meier Survival curves: The cancer-specific survival of patients with gastric cancer by marital status in 1:1 matching, unmarried versus married patients.  $\chi^2=35.35$ ,  $P<0.001$

**Supplementary Table S1: Univariate and multivariate survival analysis for overall survival (OS) predictors. SEER 2004-2012 (n=16910)**

See Supplementary File 1

**Supplementary Table S2: Characteristics of patients by marital status in 1:1 matching, unmarried versus married. SEER 2004-2012 (n=14056)<sup>a</sup>**

See Supplementary File 1

**Supplementary Table S3: Univariate and multivariate survival analysis for gastric cancer-caused special survival (CSS) predictors in 1:1 matching. SEER 2004-2012 (n=14056)**

See Supplementary File 1

**Supplementary Table S4: Univariate and multivariate survival analysis for marital status on overall survival (OS) by stage at diagnosis. SEER 2004-2012 (n=16910)**

| TNM stage                | Univariate analysis |                   |         | Multivariate analysis |           |         |
|--------------------------|---------------------|-------------------|---------|-----------------------|-----------|---------|
|                          | 5-year OS           | Log rank $\chi^2$ | P value | HR                    | 95%CI     | P value |
| <b>StageI(n=4468)</b>    |                     |                   |         |                       |           |         |
| <b>Marital status</b>    |                     | 105.13            | <0.001  |                       |           |         |
| Unmarried                | 44.59%              |                   |         | Reference             |           |         |
| Married                  | 60.60%              |                   |         | 0.93                  | 0.84-1.03 | 0.139   |
| <b>StageII(n=3, 724)</b> |                     |                   |         |                       |           |         |
| <b>Marital status</b>    |                     | 60.38             | <0.001  |                       |           |         |
| Unmarried                | 30.78%              |                   |         | Reference             |           |         |
| Married                  | 43.39%              |                   |         | 0.85                  | 0.78-0.94 | 0.001   |
| <b>StageIII(n=4077)</b>  |                     |                   |         |                       |           |         |
| <b>Marital status</b>    |                     | 31.99             | <0.001  |                       |           |         |
| Unmarried                | 16.03%              |                   |         | Reference             |           |         |
| Married                  | 22.70%              |                   |         | 0.88                  | 0.82-0.96 | 0.003   |
| <b>StageIV(n=4641)</b>   |                     |                   |         |                       |           |         |
| <b>Marital status</b>    |                     | 16.34             | <0.001  |                       |           |         |
| Unmarried                | 3.33%               |                   |         | Reference             |           |         |
| Married                  | 3.50%               |                   |         | 0.92                  | 0.86-0.99 | 0.018   |

Abbreviation: NOS= no other specific; SEER=Surveillance, Epidemiology and End Results.

**Supplementary Table S5: Characteristics of patients by surgery with corresponding multinomia univariate analysis. SEER 2004-2012 (n=16910)<sup>a</sup>**

See Supplementary File 1

**Supplementary Table S6: Characteristics of patients by radiotherapy with corresponding multinomia univariate analysis. SEER 2004-2012 (n=16910)<sup>a</sup>**

See Supplementary File 1

**Supplementary Table S7: Multinomial multivariate analysis of surgical type by marital status, compared to patients with non-total or non-near-total gastrectomy. SEER 2004-2012 (n=16910)**

| Surgery                                        | Multivariate analysis |           |         |
|------------------------------------------------|-----------------------|-----------|---------|
|                                                | RRR                   | [95%CI]   | P value |
| <b>No surgery</b>                              |                       |           |         |
| <b>Marital Status</b>                          |                       |           |         |
| Unmarried                                      | Reference             |           |         |
| Married                                        | 0.75                  | 0.69-0.81 | <0.001  |
| <b>Non-Total or Non-near-total gastrectomy</b> | (base outcome)        |           |         |
| <b>Marital Status</b>                          |                       |           |         |
| Unmarried                                      |                       |           |         |
| Married                                        |                       |           |         |
| <b>Total or near total gastrectomy</b>         |                       |           |         |
| <b>Marital Status</b>                          |                       |           |         |
| Unmarried                                      | Reference             |           |         |
| Married                                        | 1.03                  | 0.93-1.14 | 0.55    |

Abbreviation: SEER=Surveillance, Epidemiology and End Results.

**Supplementary Table S8: Univariate and multivariate survival analysis for marital status on overall survival (OS) by treatments. SEER 2004-2012 (n=16910)**

| Treatment                                    | Univariate analysis |                   |         | Multivariate analysis |           |         |
|----------------------------------------------|---------------------|-------------------|---------|-----------------------|-----------|---------|
|                                              | 5-year OS           | Log rank $\chi^2$ | P value | HR                    | 95%CI     | P value |
| <b>Surgery and radiotherapy (n=3159)</b>     |                     |                   |         |                       |           |         |
| <b>Marital Status</b>                        |                     | 8.81              | 0.003   |                       |           |         |
| Unmarried                                    | 37.59%              |                   |         | Reference             |           |         |
| Married                                      | 43.12%              |                   |         | 0.92                  | 0.83-1.03 | 0.131   |
| <b>Surgery without radiotherapy (n=8108)</b> |                     |                   |         |                       |           |         |
| <b>Marital Status</b>                        |                     | 45.31             | <0.001  |                       |           |         |
| Unmarried                                    | 33.06%              |                   |         | Reference             |           |         |
| Married                                      | 41.24%              |                   |         | 0.86                  | 0.81-0.92 | <0.001  |
| <b>No surgery but radiotherapy (n=709)</b>   |                     |                   |         |                       |           |         |
| <b>Marital Status</b>                        |                     | 0.74              | 0.390   |                       |           |         |
| Unmarried                                    | 4.70%               |                   |         |                       |           |         |
| Married                                      | 4.53%               |                   |         |                       |           |         |
| <b>No surgery or radiotherapy (n=4681)</b>   |                     |                   |         |                       |           |         |
| <b>Marital Status</b>                        |                     | 10.59             | 0.001   |                       |           |         |
| Unmarried                                    | 3.11%               |                   |         | Reference             |           |         |
| Married                                      | 4.08%               |                   |         | 0.87                  | 0.81-0.94 | <0.001  |
| <b>Unknow (n=253)</b>                        |                     |                   |         |                       |           |         |
| <b>Marital Status</b>                        |                     | 0.19              | 0.665   |                       |           |         |
| Unmarried                                    | 29.96%              |                   |         |                       |           |         |
| Married                                      | 28.48%              |                   |         |                       |           |         |

Abbreviation: NOS= no other specific; SEER=Surveillance, Epidemiology and End Results.
